RESEARCH ARTICLE

# JAK2<sup>V617F</sup> Drives Mcl-1 Expression and Sensitizes Hematologic Cell Lines to Dual Inhibition of JAK2 and Bcl-xL

Jun Guo, Lisa Roberts, Zhui Chen<sup>‡a</sup>, Philip J. Merta, Keith B. Glaser\*, O. Jameel Shah<sup>‡b</sup>

Oncology Division, Research & Development, AbbVie Inc., North Chicago, Illinois, United States of America

<sup>‡a</sup> Current address: Novartis Institutes for BioMedical Research (China), Shanghai, P.R. China

<sup>‡b</sup> Current address: Eurofins Panlabs Inc., Bothell, Washington, United States of America

\* [keith.glaser@abbvie.com](mailto:keith.glaser@abbvie.com)

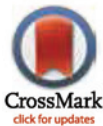

OPEN ACCESS

**Citation:** Guo J, Roberts L, Chen Z, Merta PJ, Glaser KB, Shah OJ (2015) JAK2<sup>V617F</sup> Drives Mcl-1 Expression and Sensitizes Hematologic Cell Lines to Dual Inhibition of JAK2 and Bcl-xL. PLoS ONE 10(3): e0114363. doi:10.1371/journal.pone.0114363

**Academic Editor:** Kevin D Bunting, Emory University, UNITED STATES

**Received:** July 1, 2014

**Accepted:** November 10, 2014

**Published:** March 17, 2015

**Copyright:** © 2015 Guo et al. This is an open access article distributed under the terms of the [Creative Commons Attribution License](https://creativecommons.org/licenses/by/4.0/), which permits unrestricted use, distribution, and reproduction in any medium, provided the original author and source are credited.

**Data Availability Statement:** Relevant data are within the paper and its Supporting Information files.

**Funding:** JG, LR, PJM, OJS, and KG are or were employees of AbbVie. The design, research, and financial support for this research was provided by AbbVie. AbbVie participated in the interpretation of data, review, and approval of the manuscript.

**Competing Interests:** JG, LR, PM, OJS, and KG are employees, former employees, or retirees of Abbott/AbbVie. The design, research, and financial support for this research was provided by AbbVie. AbbVie participated in the interpretation of data, review, and

## Abstract

Constitutive activation of the Janus kinase (JAK)/signal transducer and activator of transcription (STAT) axis is fundamental to the molecular pathogenesis of a host of hematological disorders, including acute leukemias and myeloproliferative neoplasms (MPN). We demonstrate here that the major JAK2 mutation observed in these diseases (JAK2<sup>V617F</sup>) enforces Mcl-1 transcription via STAT3 signaling. Targeting this lesion with JAK inhibitor I (JAKi-I) attenuates STAT3 binding to the Mcl-1 promoter and suppresses Mcl-1 transcript and protein expression. The neutralization of Mcl-1 in JAK2<sup>V617F</sup>-harboring myelodysplastic syndrome cell lines sensitizes them to apoptosis induced by the BH3-mimetic and Bcl-xL/Bcl-2 inhibitor, ABT-263. Moreover, simultaneously targeting JAK and Bcl-xL/-2 is synergistic in the presence of the JAK2<sup>V617F</sup> mutation. These findings suggest that JAK/Bcl-xL/-2 inhibitor combination therapy may have applicability in a range of hematological disorders characterized by activating JAK2 mutations.

## Introduction

Inappropriate STAT activation plays a central role in the molecular pathogenesis of a range of hematologic disorders including acute myeloid leukemia (AML) [1,2], acute lymphoblastic leukemia (ALL) [3,4] and chronic myelogenous leukemia (CML) [5] as well as the myeloproliferative neoplasms polycythemia vera (PV), essential thrombocytopenia (ET), and primary myelofibrosis (PMF). This is generally explained by the high frequency of somatic mutation in genes encoding tyrosine kinases proximal to STAT3/5 such as *FLT3*, *KIT*, *JAK2*, *JAK3*, and *MPL*. Though several oncogenic JAK2 variants have been described, JAK2 mutation manifests primarily as a single non-conservative substitution (V617F) in the JH2 pseudokinase domain. This lesion disables the auto-inhibitory interaction between pseudokinase domain and activation loop residues producing a constitutively active kinase. As JAK2 mutation is observed in nearly all cases of PV, JAK2 mutational status is now a major diagnostic criterion for this disease. Moreover, JAK2 or MPL mutation in ET and PMF is considered diagnostic of clonal

approval of the manuscript. This does not alter the authors' adherence to PLOS ONE policies on sharing data and materials.

hematopoiesis [6,7], and JAK mutations are found at high frequency in relapsed ALL [8]. Several small-molecule inhibitors of JAK2 are in clinical development for PV, ET, and PMF [9], and Ruxolitinib (formerly INCB18424) has received FDA approval for PMF.

The STAT target genes Mcl-1 and Bcl-XL collaborate to oppose apoptosis mediated by pro-apoptotic BH3-only proteins [10,11]. We reasoned that mutational activation of Jak2 may enforce Mcl-1 and/or Bcl-XL expression, whereas inhibition of JAK2 in this context may reduce the expression of these pro-survival Bcl-2 family members. Expression of Mcl-1 represents a barrier to apoptosis induced by the Bcl-2 family inhibitors, ABT-737 and ABT-263 [10,12, 13], which inhibit Bcl-XL, Bcl-2, and Bcl-w [14,15]. Thus, a reduction in Mcl-1 shifts the burden to maintain cell survival to Bcl-XL, thereby lowering the threshold for apoptosis mediated by Bcl-XL/-2 inhibition. As combination chemotherapy has become a mainstay in clinical oncology, we set out to ascertain the potential utility of combining JAK and Bcl-2 family inhibitors as therapy in *JAK2*<sup>V617F</sup>-positive leukemias.

## Materials and Methods

### Cell Culture and Extraction

JAK inhibitor I (JAKi-I; cat# 420099) was purchased from Calbiochem. SET-2, HEL, MV4;11, and K562 cells were obtained from ATCC and cultured as recommended. UKE-1 cells were purchased from Walter Fiedler (University of Hamburg). Cell lysates were either prepared using CHAPS lysis buffer (10 mM HEPES, pH 7.4, 150 mM NaCl, 1% CHAPS) or cell extraction buffer containing 1% Triton X-100, 0.1% SDS, and 0.5% deoxycholate. All buffers were supplemented with protease and phosphatase inhibitor cocktails prior to use.

### Immunoprecipitation

For immunoprecipitation, lysates were prepared in CHAPS lysis buffer and 2 mg of cell lysate was mixed with at least 8 µg of immunoprecipitating antibody overnight at 4°C. The following day, 30 µl of a Protein A- or Protein G-agarose slurry was added for an additional 2 hr. Immunoprecipitates were washed three times in CHAPS lysis buffer, and heated in 1.5x loading buffer at 95°C for 5 min.

### siRNA Transfection and Cell Viability Assay

Transfection of siRNAs was performed using Lipofectamine RNAiMAX according to the manufacturer's recommendations. Cell viability was determined using the alamarBlue cell viability assay (Invitrogen) according to manufacturer's suggested protocol after exposure to drug combinations for 72 hr. Caspase-3 activity was determined using the Caspase-GLO 3/7 Assay (Promega) in parallel with the CellTiter-GLO viability assay (Promega). The data are expressed as Caspase-3/7 activity divided by cell viability.

### TR-FRET and ChIP assays

Ki values of JAKi-I for individual kinases were determined by time-resolved fluorescence resonance energy transfer (TR-FRET) by displacement of proprietary Oregon Green-labelled probes with test compounds. ChIP using STAT3 antibodies was carried out using the EZ-ChIP assay kit (Millipore).

### Statistical Analysis

Synergistic activities of JAKi-I and ABT-263 were determined using the Bliss additivity model [16] where the combined response C of both agents with individual effects A and B is  $C = A +$

$B = (A \cdot B)$  and where A and B represent the fractional inhibition between 0 and 1. Combined response scores greater than 0.15 were considered synergistic and scores lower than 0.15 were considered antagonistic.

## Results

### Regulation of Mcl-1 and Bcl-XL by *JAK2*<sup>V617F</sup>

JAKi-I is a selective inhibitor of JAK2 (Fig. 1A) and induces the rapid, dose-dependent inhibition of phosphorylation of both STAT3 and STAT5 (Fig. 1B). All leukemia lines tested displayed constitutive phosphorylation of STAT3/5 in the absence of serum, but only in cell lines carrying the *JAK2*<sup>V617F</sup> mutation was STAT3/5 phosphorylation inhibited following treatment with JAKi-I (Fig. 1C). Mcl-1 and Bcl-XL transcript and protein levels (Fig. 1D-G) sharply declined over a 24-hr time period following JAK inhibition, and similar results were observed

Figure 1

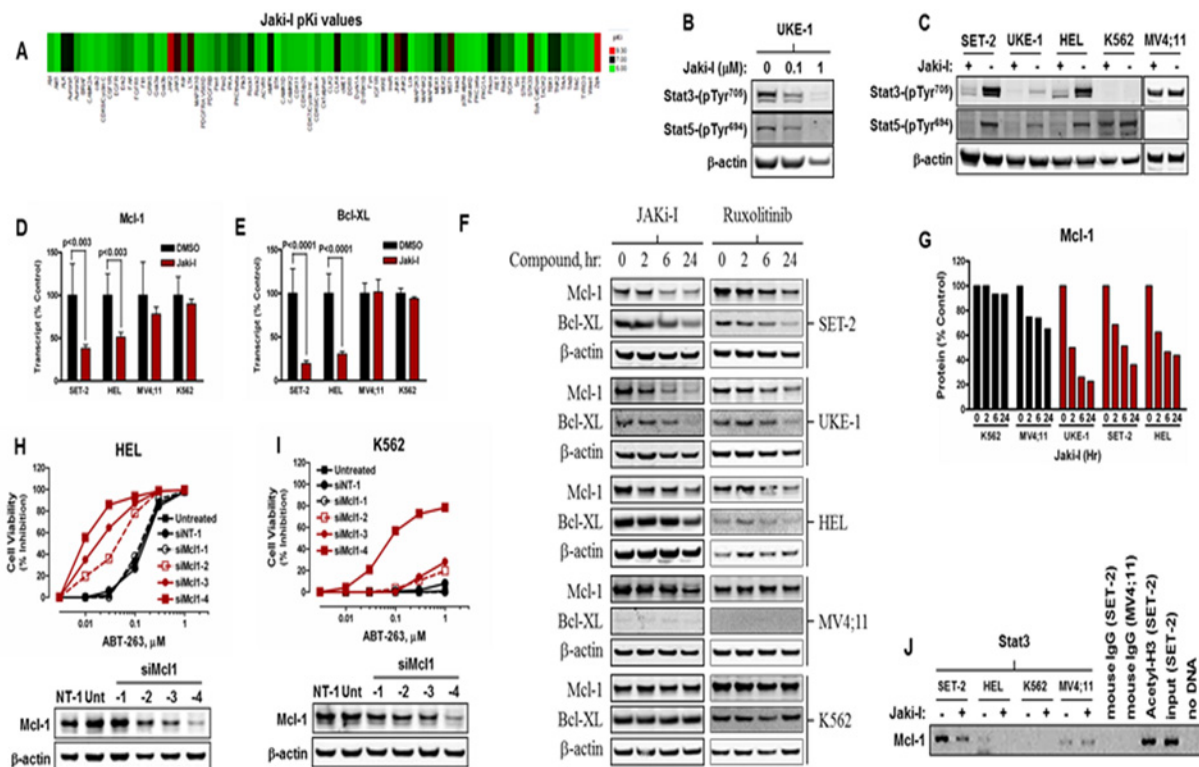

**Fig 1. Regulation of Mcl-1 and Bcl-XL by *JAK2*<sup>V617F</sup>.** (A) JAKi-I was evaluated in a panel of 66 human protein kinases as detailed in the Methods section, and Ki values determined. Red, <0.01  $\mu$ M; black, 0.01–1.67  $\mu$ M, green, >1.67  $\mu$ M. (B) UKE-1 (*JAK2*<sup>V617F</sup>) AML cells were treated for 10 min with JAKi-I as indicated. Tyrosine phosphorylation of STAT3 and STAT5 was determined by immunoblotting. (C) The *JAK2*<sup>V617F</sup>-positive AML cell lines, SET-2, UKE-1, and HEL, the chronic myelogenous leukemia line, K562 (*JAK2*<sup>V617F</sup>-negative), and the AML cell line, MV4;11 (*JAK2*<sup>V617F</sup>-negative), were cultured in the absence of serum for 2 hr, then treated with 1  $\mu$ M JAKi-I for 1 hr. Constitutive tyrosine phosphorylation of STAT3 and STAT5 was determined by immunoblotting. (D and E) Cells were treated for 6 hr with JAKi-I, and the abundance of Mcl-1 and Bcl-XL mRNA was determined by qPCR. Data represent means  $\pm$  standard deviation for two independent determinations each performed in triplicate. (F) Cells were treated with JAKi-I or Ruxolitinib over a 24-hr time course, and Mcl-1 and Bcl-XL levels were determined by immunoblotting (similar results were observed for 2 separate immunoblots). (G) Quantification of the data shown in (F). Data are expressed as the ratio of intensity of Mcl-1/ $\beta$ -actin for each time point. (H and I) HEL or K562 cells were transfected with either non-targeting (siNT-1) or Mcl-1-specific (siMcl1-1–4) siRNAs, treated for 72 hr with ABT-263, then lysates were prepared, and cell viability was determined. Data are means of duplicate samples and are representative of two independent experiments. (J) Cells were treated for 6 hr with or without 1  $\mu$ M JAKi-I then subjected chromatin immunoprecipitation assays using normal mouse IgG, anti-acetylated histone H3, or anti-STAT3. Mcl-1 promoter binding was determined by PCR on chromatin immunoprecipitates (for immunoblots, similar results were obtained twice).

doi:10.1371/journal.pone.0114363.g001

with Ruxolitinib, a clinical relevant drug. Although Mcl-1 protein can also be regulated by protein degradation, protein stability was not altered upon JAKi-I treatment in the presence of cycloheximide (data not shown). Chromatin immunoprecipitation experiments demonstrated that STAT3 interacted with the *MCL1* promoter (Fig. 1J). Promoter binding was disrupted following treatment with JAKi-I in cell lines expressing  $JAK2^{V617F}$ , but not in cell lines without this lesion.

Reducing the levels of Mcl-1, irrespective of *JAK2* mutation, sensitizes leukemia cells to ABT-263 (Fig. 1H-I), indicating that Bcl-2 family proteins, such as Bcl-xL and Bcl-2, are necessary to maintain viability when Mcl-1 levels are reduced.

### Combination of JAK2 Inhibitor and ABT-263 Yields Synergistic Activity in $JAK2^{V617F}$ -Harboring AML Cell Lines

Of the pro-apoptotic BH3-only proteins normally sequestered by anti-apoptotic members of the Bcl-2 family, Bim binds both Mcl-1 and Bcl-xL [17,18]. We therefore asked whether the loss of Mcl-1 induced by JAK inhibition resulted in increased binding of Bim to Bcl-xL. Although the abundance of total Bim protein was not altered following treatment with JAKi-I (Fig. 2A), Bim was enriched in Bcl-XL immunoprecipitates in the presence of the  $JAK2^{V617F}$  mutation (Fig. 2B). In cells treated with ABT-263, Bim was displaced from Bcl-XL (Fig. 2B) irrespective of *JAK2* mutational status. To assess whether suppression of Mcl-1 by treatment with JAKi-I would indeed potentiate apoptosis induced by Bcl-xL/-2 inhibition, we pretreated cell lines with JAKi-I for 6 hr (time sufficient for Mcl-1 levels to decline) followed by ABT-263 and monitored the activity of caspase-3. Whereas neither JAKi-I nor ABT-263 alone induced caspase-3 activity, a synergistic induction was evident within four hours specifically in cell lines harboring  $JAK2^{V617F}$  (Fig. 2C).

These data suggested that in *JAK2*-driven malignancies, the reduction in Mcl-1 that results from JAK/STAT inhibition could be leveraged in a therapeutic combination that simultaneously neutralizes Bcl-xL/-2. Only  $JAK2^{V617F}$ -positive AML lines were sensitized to ABT-263 upon JAK inhibition as indicated by the leftward shift in ABT-263  $EC_{50}$  (Fig. 2D-G). We then assessed drug-drug interactions using a matrix of pairwise combinations that covered half-log dose-responses between 0.03 and 1  $\mu$ M for both JAKi-I and ABT-263 and using 72-hr cell viability as an endpoint. The viability data were then analyzed using the Bliss additivity mode [19] to define dose combinations that were synergistic, antagonistic, or without effect. Synergistic interactions were observed for multiple dose combinations specifically in cell lines carrying the  $JAK2^{V617F}$  lesion (Fig. 2H). Similar phenotypic enhancements by Ruxolitinib, a clinical relevant JAK inhibitor, combined with ABT-263 were also observed (data not shown). A recent study [20] also supported our data that Bcl-2/Bcl-xL inhibitor ABT-737 was effective in combination with *JAK2* inhibition.

## Discussion

Targeting mutant  $JAK2^{V617F}$ , which leads to constitutively activation of *JAK2* and its downstream pathways, has potential as a therapeutic approach as that mutation leads to blockage of apoptosis and uncontrolled cellular proliferation.

Combination of *JAK2* inhibitors with other therapeutic agents has demonstrated beneficial effects on growth inhibition of  $JAK2^{V617F}$ -expressing cells. The combination of an Aurora kinase inhibitor (VX-680) with a *JAK2* inhibitor (TG101209) has recently been shown to synergistically reduce the proliferation of  $JAK2^{V617F}$ -positive cells. Also, the use of a *JAK2* inhibitor in combination with suppression of the PI3K/Akt or mTOR pathways synergistically reduced the proliferation of  $JAK2^{V617F}$ -positive cells [21]. Therefore, combinations that synergistically

Figure 2

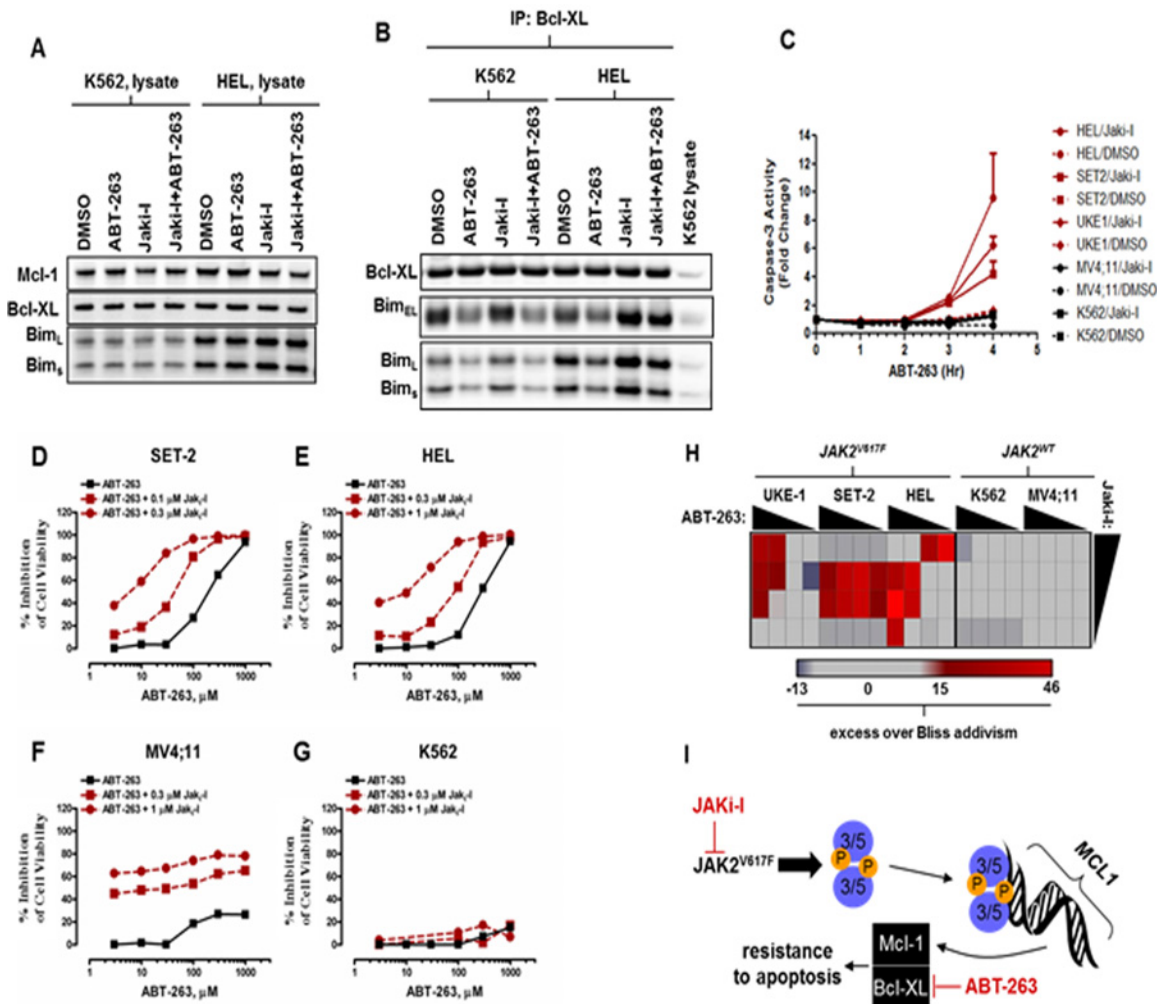

**Fig 2. Combination of JAK2 and Bcl-2 family inhibitors yields synergistic antiproliferative activity in *JAK2*<sup>V617F</sup>-harboring AML cell lines.** (A/B) HEL and K562 cells were treated for 6 hr with 1  $\mu$ M JAKi-I followed by 3 hr with 0.15  $\mu$ M ABT-263, then lysates or Bcl-XL immunoprecipitates were prepared and immunoblotted. (C) Cells were treated for 6 hr with 1  $\mu$ M JAKi-I followed by 0.15  $\mu$ M ABT-263 over a 3-hr time period. Caspase-3 activity was determined at each time point. Data are from duplicate samples and are representative of at least three independent experiments. (D-G) Cells were treated in combination as indicated, and cell viability was determined after 72 hr. Data are means of duplicate determinations, and are representative of at least three independent experiments. (H) Drug-drug interactions were determined using a matrix of pairwise combinations covering half-log dose responses from 0.03 to 1  $\mu$ M for both JAKi-I and ABT-263. Drugs were added simultaneously, and cell viability was determined after 72 hr. The data were then analyzed using the drug-drug interaction model of Bliss additivity<sup>16</sup> to define dose combinations that were synergistic (values >15; red), antagonistic (values <-15; blue), or without effect (-15 < values < 15; gray). (I) Model of JAK2/Bcl-2 family inhibitor synergy. *JAK2*<sup>V617F</sup> constitutively phosphorylates and activates STAT3/5, thus enforcing expression of the transcriptional target, Mcl-1. Mcl-1 collaborates with Bcl-XL to oppose apoptosis and support viability. Inhibition of JAK2 in this context silences JAK/STAT-driven transcription of Mcl-1, leaving survival largely dependent upon Bcl-XL. Neutralization of Bcl-XL with ABT-263 is then achieved at a lower dose and is sufficient to induce apoptosis.

doi:10.1371/journal.pone.0114363.g002

enhance efficacy provide the potential to reduce drug levels and reduce toxicity. In addition, combining two compounds with different mechanisms of action may reduce the probability of developing resistance to either of the drugs.

In this study, we expanded upon previous results [22,23] that the JAK inhibitor I impairs proliferation in *JAK2* mutant cell lines by demonstrating a key role of Mcl-1 regulation in this synergistic effect. Mcl-1 is apparently regulated by STAT3 as determined by CHIP analysis,

which may also implicate STAT5 due to co-regulation by JAK. The biological properties of ABT-263, a potent, orally bioavailable, Bad-like, BH3 mimetic ( $K_i$ 's of  $<1$  nmol/L for Bcl-2, Bcl-xL, and Bcl-w) have been reported previously [24]. In vivo, ABT-263 exhibited pronounced oral activity in multiple xenograft models, both as a single agent and in combination with standard of care chemotherapies [24]. In cells, ABT-263 inhibits the interaction between pro-apoptotic and anti-apoptotic Bcl-2 family proteins in both a mammalian two hybrid system and in FL5.12 cells. IL-3 withdrawal in FL5.12 cells has previously been shown to dramatically increase Bim and reduce Mcl-1 levels, resulting in the induction of apoptosis [25,26]. Recent studies indicated that Bcl-2 inhibitors, ABT-737 and ABT-199, do show synergy with imatinib in BCR-ABL cells [27,28].

The JAK/STAT pathway is constitutively activated (phosphorylated) in cells harboring the  $JAK^{V617E}$  mutation. As tyrosine phosphorylation of STAT proteins induces transcriptional activation through homodimerization, selective inhibition of STAT3/5 phosphorylation in  $JAK2^{V617F}$ -harboring leukemia lines suggested that transcriptional targets of STAT3/5 may be silenced selectively in these lines. Mcl-1 is a STAT transcriptional target [29,30,31] and was of particular interest as it has been shown to confer resistance to apoptosis following inhibition of Bcl-xL and Bcl-2 [10,12,13]. Mcl-1 expression is, therefore, transcriptionally enforced by the JAK/STAT pathway in AML cell lines harboring  $JAK2^{V617F}$ . This suggests that leukemias that express  $JAK2^{V617F}$  may display a reduced threshold for apoptosis induced by ABT-263 in combination with JAKi-I. The presence of alternative STAT3/5 activating lesions in MV;411 ( $FLT3^{ITD}$ ) and K562 ( $BCR-ABL$ ), renders STAT3/5 phosphorylation JAK-independent [32,33,34]; therefore, resistant to the combination as demonstrated herein. The observation that ABT-263 fails to induce caspase-3 activity during this period indicates that the BH3-only proteins displaced from Bcl-xL/-2 are not sufficiently abundant to exceed the binding capacity of additional antiapoptotic members such as Mcl-1. These data indicate  $JAK2^{V617F}$  constitutively phosphorylates and activates STAT3/5, thus enforcing expression of the transcriptional targets Mcl-1 and Bcl-xL. Mcl-1 collaborates with Bcl-xL to oppose apoptosis and support viability. Inhibition of JAK2 in this context silences JAK/STAT-driven transcription of Mcl-1, leaving survival largely dependent upon remaining Bcl-xL. Neutralization of Bcl-xL with ABT-263 is then achieved at a lower dose and is sufficient to induce apoptosis (Fig. 2I). These findings have broad implications for targeted combination therapy in JAK2-driven hematologic malignancies as well as MPN/MDS.

## Supporting Information

**S1 Dataset. JAKi-I was evaluated in a panel of 66 human protein kinases by TR-FRET enzyme assays as detailed in the Methods section, and  $K_i$  values determined.** Individual  $K_i$  values are given in the table.

(XLS)

**S2 Dataset. Cells were treated for 6 hr with JAKi-I, and the abundance of Mcl-1 and Bcl-XL mRNA was determined by qPCR.** Data represent means  $\pm$  standard deviation for two independent determinations each performed in triplicate (data in Summary tab). Individual experimental data in exp 051409 and repeat Mcl1 tabs.

(XLS)

**S3 Dataset. Quantitation of western blot data by LiCor Odyssey Imager.**

(XLS)

**S4 Dataset. HEL or K562 cells were transfected with either non-targeting (siNT-1) or Mcl-1-specific (siMcl1-1-4) siRNAs for 48 hr, subsequently treated for 72 hr with ABT-263,**

then lysates were prepared, and cell viability was determined. Data are means of duplicate samples and are representative of two independent experiments.

(XLS)

**S5 Dataset. The data are expressed as the “per cell” induction of Caspase-3/-7.** In [Fig. 2C](#) the data are expressed as Caspase-3/7 activity divided by cell viability, and then this ratio is used to calculate the fold change comparing with control. This is a way to appropriately normalize the caspase induction to the cell number (which may change during treatment, e.g., cell number will be reduced as cell die).

(XLS)

**S6 Dataset. Cells were treated in combination as indicated, and cell viability was determined using alamarBlue after 72 hr.** Data are means of duplicate determinations, and are representative of at least three independent experiments.

(XLS)

## Acknowledgments

We would like to thank Darren Phillips and Chris Tse for helpful discussions and Mark Anderson of AbbVie for critical review of the manuscript.

## Author Contributions

Conceived and designed the experiments: JG OJS. Performed the experiments: JG OJS LR PJM ZC. Analyzed the data: JG OJS. Contributed reagents/materials/analysis tools: JG OJS LR PJM ZC KG. Wrote the paper: OJS JG KG.

## References

1. Birkenkamp KU, Geugien M, Lemmink HH, Kruijer W, Vellenga E (2001) Regulation of constitutive STAT5 phosphorylation in acute myeloid leukemia blasts. *Leukemia* 15:1923–1931.
2. Hayakawa F, Towatari M, Iida H, Wakao H, Kiyoi H et al (1998) Differential constitutive activation between STAT-related proteins and MAP kinase in primary acute myelogenous leukaemia. *Br J Haematol.* 101:521–528. PMID: [9633897](#)
3. Weber-Nordt RM, Egen C, Wehinger J, Ludwig W, Gouilleux-Gruart V et al. (1996) Constitutive activation of STAT proteins in primary lymphoid and myeloid leukemia cells and in Epstein-Barr virus (EBV)-related lymphoma cell lines. *Blood* 88:809–816.
4. Gouilleux-Gruart V, Gouilleux F, Desaint C, Claisse JF, Capiod JC et al. (1996) STAT-related transcription factors are constitutively activated in peripheral blood cells from acute leukemia patients. *Blood* 87:1692–1697. PMID: [8634413](#)
5. Lewis RS, Ward AC (2008) Stat5 as a diagnostic marker for leukemia. *Expert Rev Mol Diagn.* 8:73–82. PMID: [18088232](#)
6. Tefferi A, Vardiman JW (2008) Classification and diagnosis of myeloproliferative neoplasms: the 2008 World Health Organization criteria and point-of-care diagnostic algorithms. *Leukemia* 22:14–22.
7. Tefferi A, Thiele J, Orazi A, Kvasnicka HM, Barbui T et al. (2007) Proposals and rationale for revision of the World Health Organization diagnostic criteria for polycythemia vera, essential thrombocythemia, and primary myelofibrosis: recommendations from an ad hoc international expert panel. *Blood* 110:1092–1097. PMID: [17488875](#)
8. Mullighan CG, Zhang J, Harvey RC, Collins-Underwood JR, Schulman BA et al. (2009) JAK mutations in high-risk childhood acute lymphoblastic leukemia. *Proc Natl Acad Sci U S A* 106:9414–8 doi: [10.1073/pnas.0811761106](#) PMID: [19470474](#)
9. Sonbol MB, Firwana B, Zarzour A, Morad M, Rana V et al. (2013) Comprehensive review of JAK inhibitors in myeloproliferative neoplasms. *Ther Adv Hematol.* 4; 15–35 doi: [10.1177/2040620712461047](#) PMID: [23610611](#)

10. van Delft MF, Wei AH, Mason KD, Vandenberg CJ, Chen L et al. (2006) The BH3 mimetic ABT-737 targets selective Bcl-2 proteins and efficiently induces apoptosis via Bak/Bax if Mcl-1 is neutralized. *Cancer Cell* 10:389–399.
11. Youle RJ, Strasser A (2008) The BCL-2 protein family: opposing activities that mediate cell death. *Nat Rev Mol Cell Biol.* 9:47–59. PMID: [18097445](#)
12. Chen S, Dai Y, Harada H, Dent P, Grant S (2007) Mcl-1 down-regulation potentiates ABT-737 lethality by cooperatively inducing Bak activation and Bax translocation. *Cancer Res.* 67:782–791. PMID: [17234790](#)
13. Lin X, Morgan-Lappe S, Huang X, Li L, Zakula LA et al. (2007) 'Seed' analysis of off-target siRNAs reveals an essential role of Mcl-1 in resistance to the small-molecule Bcl-2/Bcl-XL inhibitor ABT-737. *Oncogene* 26:3972–3979. PMID: [17173063](#)
14. Oltersdorf T, Elmore SW, Shoemaker AR, Armstrong RC, Augeri DJ et al. (2005) An inhibitor of Bcl-2 family proteins induces regression of solid tumours. *Nature* 435:677–681. PMID: [15902208](#)
15. Shoemaker AR, Mitten MJ, Adickes J, Ackler S, Refici M et al. (2008) Activity of the Bcl-2 family inhibitor ABT-263 in a panel of small cell lung cancer xenograft models. *Clin Cancer Res.* 14:3268–3277. doi: [10.1158/1078-0432.CCR-07-4622](#) PMID: [18519752](#)
16. Gäbler K, Rolvering C, Kaczor J, Eulenfeld R, Mendez SA et al. (2013) Cooperative effects of Janus and Aurora kinase inhibition by CEP701 in cells expressing Jak2V617F. *J Cell Mol Med* 17:265–76. doi: [10.1111/jcmm.12005](#) PMID: [23301855](#)
17. Chen L, Willis SN, Wei A, Smith BJ, Fletcher JI et al. (2005) Differential targeting of prosurvival Bcl-2 proteins by their BH3-only ligands allows complementary apoptotic function. *Mol Cell.* 17:393–403. PMID: [15694340](#)
18. Kim H, Rafiuddin-Shah M, Tu HC, Jeffers JR, Zambetti GP et al. (2006) Hierarchical regulation of mitochondrion-dependent apoptosis by BCL-2 subfamilies. *Nat Cell Biol.* 8:1348–1358. PMID: [17115033](#)
19. Berenbaum MC (1981) Criteria for analyzing interactions between biologically active agents. *Adv Cancer Res.* 35:269–335. PMID: [7041539](#)
20. Waibel M, Solomon VS, Knight DA, Ralli RA, Kim SK et al. (2013) Combined targeting of JAK2 and Bcl-2/Bcl-xL to cure mutant JAK2-Driven malignancies and overcome acquired resistance to JAK2 inhibitors. *Cell Reports* 5: 1047–1059 doi: [10.1016/j.celrep.2013.10.038](#) PMID: [24268771](#)
21. Vannucchi AM, Bogani C, Bartalucci N, Tozzi L, Martinelli S et al. (2011) Inhibitors of PI3K/ Akt and/or mTOR Inhibit the Growth of Cells of Myeloproliferative Neoplasms and Synergize with JAK2 Inhibitor and Interferon. *Blood* 118:A3835
22. Will B, Siddiqi T, Jorda MA, Shimamura T, Luptakova K (2010) Apoptosis induced by JAK2 inhibition is mediated by Bim and enhanced by the BH3 mimetic ABT-737 in *JAK2* mutant human erythroid cells. *BLOOD* 115: 2901–09 doi: [10.1182/blood-2009-03-209544](#) PMID: [20160166](#)
23. Rubert J, Qian Z, Andraos R, Guthy D, Radimerski T (2011) Bim and Mcl-1 exert key roles in regulating *JAK2*V617F cell survival. *BMC cancer* 11:24
24. Tse C, Shoemaker AR, Adickes J, Anderson MG, Chen J et al. (2008) ABT-263: a potent and orally bio-available Bcl-2 family inhibitor. *Cancer Res.* 68:3421–3428. doi: [10.1158/0008-5472.CAN-07-5836](#) PMID: [18451170](#)
25. Harada H, Quearry B, Ruiz-Vela A, Korsmeyer SJ (2004) Survival factor-induced extracellular signal-regulated kinase phosphorylates BIM, inhibiting its association with BAX and proapoptotic activity. *Proc Natl Acad Sci U S A* 101:15313–7. PMID: [15486085](#)
26. Maurer U, Charvet C, Wagman AS, De Jardin E, Green DR (2006) Glycogen synthase kinase-3 regulates mitochondrial outer membrane permeabilization and apoptosis by destabilization of MCL-1. *Mol Cell* 21: 749–760 PMID: [16543145](#)
27. Reynoso D, Nolden LK, Yang D, Dumont SN, Conley AP et al. (2011) Synergistic induction of apoptosis by the Bcl-2 inhibitor ABT-737 and imatinib mesylate in gastrointestinal stromal tumor cells. *Mol Oncol.* 5: 93–104 doi: [10.1016/j.molonc.2010.10.003](#) PMID: [21115411](#)
28. Ko TK, Chuah CTH, Huang JWJ, Ng KP, Ong ST (2014) The Bcl-2 inhibitor ABT-199 significantly enhances imatinib-induced cell death in chronic myeloid leukemia progenitors. *Oncotarget* 1: 1–6
29. Buettner R, Mora LB, Jove R (2002) Activated STAT signaling in human tumors provides novel molecular targets for therapeutic intervention. *Clin Cancer Res.* 8:945–954. PMID: [11948098](#)
30. Epling-Burnette PK, Liu JH, Catlett-Falcone R, Turkson J, Oshiro M et al. (2001) Inhibition of STAT3 signaling leads to apoptosis of leukemic large granular lymphocytes and decreased Mcl-1 expression. *J Clin Invest.* 107:351–362.
31. Puthier D, Bataille R, Amiot M (1999) IL-6 up-regulates mcl-1 in human myeloma cells through JAK / STAT rather than ras / MAP kinase pathway. *Eur J Immunol.* 29:3945–3950. PMID: [10602002](#)



32. Choudhary C, Brandts C, Schwable J, Tickenbrock L, Sargin B et al. (2007) Activation mechanisms of STAT5 by oncogenic Flt3-ITD. *Blood* 110:370–374. PMID: [17356133](#)
33. Ilaria RL Jr., Van Etten RA (1996) P210 and P190(BCR/ABL) induce the tyrosine phosphorylation and DNA binding activity of multiple specific STAT family members. *J Biol Chem.* 271:31704–31710. PMID: [8940193](#)
34. Carlesso N, Frank DA, Griffin JD (1996) Tyrosyl phosphorylation and DNA binding activity of signal transducers and activators of transcription (STAT) proteins in hematopoietic cell lines transformed by Bcr/Abl. *J Exp Med.* 183:811–820. PMID: [8642285](#)
