# Supplementary material for: JAK2V617F Drives Mcl-1 Expression and Sensitizes Hematologic Cell Lines to Dual Inhibition of JAK2 and Bcl-xL
Source: PLoS One. 2015 Mar 17;10(3):e0114363. doi: 10.1371/journal.pone.0114363 (PMC4362760; doi:10.1371/journal.pone.0114363)
Supplement: S1 Dataset — Individual Ki values are given in the table. (XLS) [file pone.0114363.s001.xls]

## Sheet: Sheet0
Corporate ID	Assay Name	Expt Result Type	Expt Result Operator	Expt Result Units	Expt Result Value
JAKi-I	TR-FRET Kinome__ACVR1 Invitrogen .05(Subs Conc) - Ki(uM)	Ki	>	uM	4.32
JAKi-I	TR-FRET Kinome__ACVR1 Invitrogen .05(Subs Conc) - Ki(uM)	Ki	>	uM	4.32
JAKi-I	TR-FRET Kinome__ALK Invitrogen .2(Subs Conc) - Ki(uM)	Ki		uM	0.142
JAKi-I	TR-FRET Kinome__ALK Millipore .2(Subs Conc) - Ki(uM)	Ki	>	uM	5.79
JAKi-I	TR-FRET Kinome__AMPK Invitrogen .1(Subs Conc) - Ki(uM)	Ki		uM	0.148
JAKi-I	TR-FRET Kinome__Abl Invitrogen .025(Subs Conc) - Ki(uM)	Ki	>	uM	2.6
JAKi-I	TR-FRET Kinome__Abl Invitrogen .025(Subs Conc) - Ki(uM)	Ki	>	uM	2.6
JAKi-I	TR-FRET Kinome__Akt1 Invitrogen .2(Subs Conc) - Ki(uM)	Ki	>	uM	5.01
JAKi-I	TR-FRET Kinome__Aurora1 Invitrogen .025(Subs Conc) - Ki(uM)	Ki		uM	0.321
JAKi-I	TR-FRET Kinome__Aurora1 Invitrogen .025(Subs Conc) - Ki(uM)	Ki		uM	0.0473
JAKi-I	TR-FRET Kinome__Aurora2 Invitrogen .025(Subs Conc) - Ki(uM)	Ki	>	uM	1.67
JAKi-I	TR-FRET Kinome__Aurora2 Invitrogen .025(Subs Conc) - Ki(uM)	Ki	>	uM	1.67
JAKi-I	TR-FRET Kinome__BRAF Invitrogen .065(Subs Conc) - Ki(uM)	Ki	>	uM	3.37
JAKi-I	TR-FRET Kinome__BTK Invitrogen .2(Subs Conc) - Ki(uM)	Ki	>	uM	5.93
JAKi-I	TR-FRET Kinome__BTK Invitrogen .2(Subs Conc) - Ki(uM)	Ki	>	uM	5.93
JAKi-I	TR-FRET Kinome__CAMK1D Invitrogen .2(Subs Conc) - Ki(uM)	Ki	>	uM	2.48
JAKi-I	TR-FRET Kinome__CAMK1D Invitrogen .2(Subs Conc) - Ki(uM)	Ki	>	uM	2.48
JAKi-I	TR-FRET Kinome__CAMK2A Invitrogen .05(Subs Conc) - Ki(uM)	Ki	>	uM	4.32
JAKi-I	TR-FRET Kinome__CAMK2A Invitrogen .05(Subs Conc) - Ki(uM)	Ki	>	uM	4.32
JAKi-I	TR-FRET Kinome__CAMKK2 Invitrogen .03(Subs Conc) - Ki(uM)	Ki	>	uM	3.1
JAKi-I	TR-FRET Kinome__CDK11 Abbott .025(Subs Conc) - Ki(uM)	Ki	>	uM	3.24
JAKi-I	TR-FRET Kinome__CDK5/p25 Invitrogen .0125(Subs Conc) - Ki(uM)	Ki	>	uM	3.24
JAKi-I	TR-FRET Kinome__CDK7/Cyclin H/Mat1 Invitrogen .2(Subs Conc) - Ki(uM)	Ki	>	uM	4.35
JAKi-I	TR-FRET Kinome__CDK7/Cyclin H/Mat1 Invitrogen .2(Subs Conc) - Ki(uM)	Ki	>	uM	4.35
JAKi-I	TR-FRET Kinome__CDK7/Cyclin H/Mat1 Invitrogen .2(Subs Conc) - Ki(uM)	Ki	>	uM	4.35
JAKi-I	TR-FRET Kinome__CDK8/Cyclin C Invitrogen .1(Subs Conc) - Ki(uM)	Ki	>	uM	3.85
JAKi-I	TR-FRET Kinome__CDK8/Cyclin C Invitrogen .1(Subs Conc) - Ki(uM)	Ki	>	uM	3.85
JAKi-I	TR-FRET Kinome__CDK9/Cyclin K Invitrogen .01(Subs Conc) - Ki(uM)	Ki	>	uM	1.67
JAKi-I	TR-FRET Kinome__CDK9/Cyclin K Invitrogen .01(Subs Conc) - Ki(uM)	Ki	>	uM	1.67
JAKi-I	TR-FRET Kinome__CLK2 Invitrogen .05(Subs Conc) - Ki(uM)	Ki	>	uM	3.76
JAKi-I	TR-FRET Kinome__CLK2 Invitrogen .05(Subs Conc) - Ki(uM)	Ki	>	uM	3.76
JAKi-I	TR-FRET Kinome__CLK4 Invitrogen .05(Subs Conc) - Ki(uM)	Ki		uM	0.072
JAKi-I	TR-FRET Kinome__CSF1R Invitrogen .1(Subs Conc) - Ki(uM)	Ki	>	uM	2.42
JAKi-I	TR-FRET Kinome__CSF1R Invitrogen .1(Subs Conc) - Ki(uM)	Ki	>	uM	2.42
JAKi-I	TR-FRET Kinome__Ck1alpha1 Invitrogen .05(Subs Conc) - Ki(uM)	Ki	>	uM	4.12
JAKi-I	TR-FRET Kinome__Ck1alpha1 Invitrogen .05(Subs Conc) - Ki(uM)	Ki	>	uM	4.12
JAKi-I	TR-FRET Kinome__DDR1 Invitrogen .01(Subs Conc) - Ki(uM)	Ki	>	uM	2.59
JAKi-I	TR-FRET Kinome__DYRK1B Invitrogen .05(Subs Conc) - Ki(uM)	Ki	>	uM	2.65
JAKi-I	TR-FRET Kinome__DYRK1B Invitrogen .05(Subs Conc) - Ki(uM)	Ki	>	uM	2.65
JAKi-I	TR-FRET Kinome__Dyrk1A Invitrogen .0125(Subs Conc) - Ki(uM)	Ki	>	uM	1.88
JAKi-I	TR-FRET Kinome__Dyrk1A Invitrogen .0125(Subs Conc) - Ki(uM)	Ki	>	uM	1.88
JAKi-I	TR-FRET Kinome__EGFR Invitrogen .05(Subs Conc) - Ki(uM)	Ki	>	uM	1.67
JAKi-I	TR-FRET Kinome__Erk2 Invitrogen .05(Subs Conc) - Ki(uM)	Ki		uM	0.973
JAKi-I	TR-FRET Kinome__FAK Invitrogen .2(Subs Conc) - Ki(uM)	Ki		uM	3.03
JAKi-I	TR-FRET Kinome__FAK Invitrogen .2(Subs Conc) - Ki(uM)	Ki		uM	0.765
JAKi-I	TR-FRET Kinome__FAK Invitrogen .2(Subs Conc) - Ki(uM)	Ki		uM	0.765
JAKi-I	TR-FRET Kinome__FGFR1 Invitrogen .2(Subs Conc) - Ki(uM)	Ki	>	uM	4.08
JAKi-I	TR-FRET Kinome__FGFR1 Invitrogen .2(Subs Conc) - Ki(uM)	Ki	>	uM	4.08
JAKi-I	TR-FRET Kinome__Flt1 Invitrogen .1(Subs Conc) - Ki(uM)	Ki	>	uM	3.67
JAKi-I	TR-FRET Kinome__Flt1 Invitrogen .1(Subs Conc) - Ki(uM)	Ki	>	uM	3.67
JAKi-I	TR-FRET Kinome__Flt1 Invitrogen .1(Subs Conc) - Ki(uM)	Ki	>	uM	3.67
JAKi-I	TR-FRET Kinome__Fyn Invitrogen .2(Subs Conc) - Ki(uM)	Ki	>	uM	5.84
JAKi-I	TR-FRET Kinome__Fyn Invitrogen .2(Subs Conc) - Ki(uM)	Ki	>	uM	5.84
JAKi-I	TR-FRET Kinome__GRK5 Invitrogen .1(Subs Conc) - Ki(uM)	Ki		uM	2.57
JAKi-I	TR-FRET Kinome__GRK5 Invitrogen .1(Subs Conc) - Ki(uM)	Ki		uM	0.443
JAKi-I	TR-FRET Kinome__Gsk3a Invitrogen .05(Subs Conc) - Ki(uM)	Ki	>	uM	4.32
JAKi-I	TR-FRET Kinome__Gsk3a Invitrogen .05(Subs Conc) - Ki(uM)	Ki	>	uM	4.32
JAKi-I	TR-FRET Kinome__Gsk3b Invitrogen .05(Subs Conc) - Ki(uM)	Ki	>	uM	3.59
JAKi-I	TR-FRET Kinome__Gsk3b Invitrogen .05(Subs Conc) - Ki(uM)	Ki	>	uM	3.59
JAKi-I	TR-FRET Kinome__IGF1R Invitrogen .05(Subs Conc) - Ki(uM)	Ki	>	uM	2.65
JAKi-I	TR-FRET Kinome__IGF1R Invitrogen .05(Subs Conc) - Ki(uM)	Ki	>	uM	2.65
JAKi-I	TR-FRET Kinome__IKKE Invitrogen .01(Subs Conc) - Ki(uM)	Ki		uM	0.149
JAKi-I	TR-FRET Kinome__IKKE Invitrogen .01(Subs Conc) - Ki(uM)	Ki		uM	0.0894
JAKi-I	TR-FRET Kinome__InsR Invitrogen .15(Subs Conc) - Ki(uM)	Ki	>	uM	3.33
JAKi-I	TR-FRET Kinome__JAK2 Invitrogen .05(Subs Conc) - Ki(uM)	Ki		uM	0.00285
JAKi-I	TR-FRET Kinome__JAK2 Invitrogen .05(Subs Conc) - Ki(uM)	Ki		uM	0.00255
JAKi-I	TR-FRET Kinome__JAK3 Invitrogen .2(Subs Conc) - Ki(uM)	Ki		uM	0.0282
JAKi-I	TR-FRET Kinome__JAK3 Invitrogen .2(Subs Conc) - Ki(uM)	Ki		uM	0.0416
JAKi-I	TR-FRET Kinome__JNK1 Invitrogen .2(Subs Conc) - Ki(uM)	Ki		uM	0.0238
JAKi-I	TR-FRET Kinome__JNK1 Invitrogen .2(Subs Conc) - Ki(uM)	Ki		uM	0.0156
JAKi-I	TR-FRET Kinome__JNK2 Invitrogen .1(Subs Conc) - Ki(uM)	Ki		uM	0.0655
JAKi-I	TR-FRET Kinome__JNK2 Invitrogen .1(Subs Conc) - Ki(uM)	Ki		uM	0.0861
JAKi-I	TR-FRET Kinome__Kdr Invitrogen .05(Subs Conc) - Ki(uM)	Ki	>	uM	2.31
JAKi-I	TR-FRET Kinome__Kdr Invitrogen .05(Subs Conc) - Ki(uM)	Ki		uM	1.45
JAKi-I	TR-FRET Kinome__LTK Invitrogen .05(Subs Conc) - Ki(uM)	Ki		uM	0.0351
JAKi-I	TR-FRET Kinome__LTK Invitrogen .05(Subs Conc) - Ki(uM)	Ki		uM	0.0281
JAKi-I	TR-FRET Kinome__Lck Invitrogen .2(Subs Conc) - Ki(uM)	Ki	>	uM	5.93
JAKi-I	TR-FRET Kinome__Lck Invitrogen .2(Subs Conc) - Ki(uM)	Ki	>	uM	5.93
JAKi-I	TR-FRET Kinome__MAP2K3 Invitrogen .075(Subs Conc) - Ki(uM)	Ki	>	uM	3.1
JAKi-I	TR-FRET Kinome__MAP3K10 Invitrogen .005(Subs Conc) - Ki(uM)	Ki	>	uM	3.06
JAKi-I	TR-FRET Kinome__MAP4K2 Invitrogen .1(Subs Conc) - Ki(uM)	Ki	>	uM	2.75
JAKi-I	TR-FRET Kinome__MAP4K2 Invitrogen .1(Subs Conc) - Ki(uM)	Ki		uM	2.74
JAKi-I	TR-FRET Kinome__MAP4K4 Invitrogen .05(Subs Conc) - Ki(uM)	Ki		uM	0.666
JAKi-I	TR-FRET Kinome__MAP4K4 Invitrogen .05(Subs Conc) - Ki(uM)	Ki	>	uM	5.28
JAKi-I	TR-FRET Kinome__MAP4K4 Invitrogen .05(Subs Conc) - Ki(uM)	Ki		uM	4.79
JAKi-I	TR-FRET Kinome__MEK1 Invitrogen .1(Subs Conc) - Ki(uM)	Ki		uM	0.236
JAKi-I	TR-FRET Kinome__MEK1 Invitrogen .1(Subs Conc) - Ki(uM)	Ki		uM	0.0922
JAKi-I	TR-FRET Kinome__MEK2 Invitrogen .2(Subs Conc) - Ki(uM)	Ki		uM	1.36
JAKi-I	TR-FRET Kinome__MEK2 Invitrogen .2(Subs Conc) - Ki(uM)	Ki		uM	0.399
JAKi-I	TR-FRET Kinome__MST1 Invitrogen .05(Subs Conc) - Ki(uM)	Ki		uM	0.028
JAKi-I	TR-FRET Kinome__MST1 Invitrogen .05(Subs Conc) - Ki(uM)	Ki		uM	0.0295
JAKi-I	TR-FRET Kinome__Nek2 Invitrogen .025(Subs Conc) - Ki(uM)	Ki	>	uM	3.3
JAKi-I	TR-FRET Kinome__Nek2 Invitrogen .025(Subs Conc) - Ki(uM)	Ki	>	uM	3.3
JAKi-I	TR-FRET Kinome__PAK4KD Invitrogen .2(Subs Conc) - Ki(uM)	Ki	>	uM	4.62
JAKi-I	TR-FRET Kinome__PAK4KD Invitrogen .2(Subs Conc) - Ki(uM)	Ki	>	uM	4.62
JAKi-I	TR-FRET Kinome__PDGFRA V561D Invitrogen .05(Subs Conc) - Ki(uM)	Ki	>	uM	2.65
JAKi-I	TR-FRET Kinome__PDGFRA V561D Invitrogen .05(Subs Conc) - Ki(uM)	Ki	>	uM	2.65
JAKi-I	TR-FRET Kinome__PDGFRB Invitrogen .05(Subs Conc) - Ki(uM)	Ki	>	uM	1.94
JAKi-I	TR-FRET Kinome__PDGFRB Invitrogen .05(Subs Conc) - Ki(uM)	Ki	>	uM	1.94
JAKi-I	TR-FRET Kinome__PKA Invitrogen .2(Subs Conc) - Ki(uM)	Ki	>	uM	1.38
JAKi-I	TR-FRET Kinome__PKA Invitrogen .2(Subs Conc) - Ki(uM)	Ki		uM	0.536
JAKi-I	TR-FRET Kinome__PKCtheta Invitrogen .1(Subs Conc) - Ki(uM)	Ki	>	uM	2.25
JAKi-I	TR-FRET Kinome__PKCtheta Invitrogen .1(Subs Conc) - Ki(uM)	Ki		uM	0.709
JAKi-I	TR-FRET Kinome__PKCzeta Millipore IVGN Tracer .05(Subs Conc) - Ki(uM)	Ki	>	uM	5.24
JAKi-I	TR-FRET Kinome__PKG1A Millipore .05(Subs Conc) - Ki(uM)	Ki	>	uM	3.63
JAKi-I	TR-FRET Kinome__Pim1 Invitrogen .05(Subs Conc) - Ki(uM)	Ki		uM	1.19
JAKi-I	TR-FRET Kinome__Pim1 Invitrogen .05(Subs Conc) - Ki(uM)	Ki		uM	0.684
JAKi-I	TR-FRET Kinome__Pim2 Millipore .025(Subs Conc) - Ki(uM)	Ki		uM	2.11
JAKi-I	TR-FRET Kinome__Plk3 Invitrogen .05(Subs Conc) - Ki(uM)	Ki	>	uM	1.55
JAKi-I	TR-FRET Kinome__Prkcn Invitrogen .2(Subs Conc) - Ki(uM)	Ki		uM	0.126
JAKi-I	TR-FRET Kinome__Prkcn Invitrogen .2(Subs Conc) - Ki(uM)	Ki		uM	0.0864
JAKi-I	TR-FRET Kinome__RET Invitrogen .1(Subs Conc) - Ki(uM)	Ki		uM	0.225
JAKi-I	TR-FRET Kinome__RET Invitrogen .1(Subs Conc) - Ki(uM)	Ki		uM	0.216
JAKi-I	TR-FRET Kinome__Rock1 Invitrogen .1(Subs Conc) - Ki(uM)	Ki		uM	0.0573
JAKi-I	TR-FRET Kinome__Rock1 Invitrogen .1(Subs Conc) - Ki(uM)	Ki		uM	0.529
JAKi-I	TR-FRET Kinome__Rock2 Invitrogen .012(Subs Conc) - Ki(uM)	Ki	>	uM	3.33
JAKi-I	TR-FRET Kinome__Rsk2 Invitrogen .0125(Subs Conc) - Ki(uM)	Ki		uM	2.47
JAKi-I	TR-FRET Kinome__Rsk2 Invitrogen .0125(Subs Conc) - Ki(uM)	Ki		uM	0.379
JAKi-I	TR-FRET Kinome__SGK1 Millipore .1(Subs Conc) - Ki(uM)	Ki		uM	0.626
JAKi-I	TR-FRET Kinome__STK16 Invitrogen IVGN Tracer .05(Subs Conc) - Ki(uM)	Ki	>	uM	5.41
JAKi-I	TR-FRET Kinome__STK33 Invitrogen .005(Subs Conc) - Ki(uM)	Ki		uM	0.0302
JAKi-I	TR-FRET Kinome__Src Invitrogen IVGN Tracer .05(Subs Conc) - Ki(uM)	Ki	>	uM	5.73
JAKi-I	TR-FRET Kinome__Syk CatDom .006(Subs Conc) - Ki(uM)	Ki	>	uM	3.26
JAKi-I	TR-FRET Kinome__TAOK2 Invitrogen .2(Subs Conc) - Ki(uM)	Ki	>	uM	6.61
JAKi-I	TR-FRET Kinome__TAOK2 Invitrogen .2(Subs Conc) - Ki(uM)	Ki	>	uM	6.61
JAKi-I	TR-FRET Kinome__TBK1 Invitrogen .00625(Subs Conc) - Ki(uM)	Ki		uM	0.237
JAKi-I	TR-FRET Kinome__TBK1 Invitrogen .00625(Subs Conc) - Ki(uM)	Ki		uM	0.206
JAKi-I	TR-FRET Kinome__TNK2 Invitrogen .05(Subs Conc) - Ki(uM)	Ki		uM	0.28
JAKi-I	TR-FRET Kinome__TNK2 Invitrogen .05(Subs Conc) - Ki(uM)	Ki		uM	0.133
JAKi-I	TR-FRET Kinome__TYRO3 Invitrogen .2(Subs Conc) - Ki(uM)	Ki	>	uM	2.86
JAKi-I	TR-FRET Kinome__TYRO3 Invitrogen .2(Subs Conc) - Ki(uM)	Ki	>	uM	2.86
JAKi-I	TR-FRET Kinome__TrkA Invitrogen .05(Subs Conc) - Ki(uM)	Ki	>	uM	2.88
JAKi-I	TR-FRET Kinome__TrkA Invitrogen .05(Subs Conc) - Ki(uM)	Ki	>	uM	2.88
JAKi-I	TR-FRET Kinome__TrkB Invitrogen .025(Subs Conc) - Ki(uM)	Ki		uM	2.83
JAKi-I	TR-FRET Kinome__TrkB Invitrogen .025(Subs Conc) - Ki(uM)	Ki		uM	0.912
JAKi-I	TR-FRET Kinome__TrkC Invitrogen .00625(Subs Conc) - Ki(uM)	Ki	>	uM	3.44
JAKi-I	TR-FRET Kinome__TrkC Invitrogen .00625(Subs Conc) - Ki(uM)	Ki		uM	3.14
JAKi-I	TR-FRET Kinome__Wee1 Carna Biosciences .015(Subs Conc) - Ki(uM)	Ki	>	uM	3.64
JAKi-I	TR-FRET Kinome__Zipk Invitrogen .05(Subs Conc) - Ki(uM)	Ki		uM	0.00122
JAKi-I	TR-FRET Kinome__Zipk Invitrogen .05(Subs Conc) - Ki(uM)	Ki		uM	0.00108
JAKi-I	TR-FRET Kinome__cMET Invitrogen .0125(Subs Conc) - Ki(uM)	Ki	>	uM	2.75
JAKi-I	TR-FRET Kinome__cMET Invitrogen .0125(Subs Conc) - Ki(uM)	Ki	>	uM	2.75
JAKi-I	TR-FRET Kinome__cdk2 Invitrogen .05(Subs Conc) - Ki(uM)	Ki	>	uM	3.24
JAKi-I	TR-FRET Kinome__p38 alpha Invitrogen IVGN Tracer .1(Subs Conc) - Ki(uM)	Ki	>	uM	3.92
JAKi-I	TR-FRET Kinome__p38 alpha Invitrogen IVGN Tracer .1(Subs Conc) - Ki(uM)	Ki	>	uM	3.92
